# Supplementary material for: Synthetic hormone-responsive transcription factors can monitor and re-program plant development
Source: eLife journal article supplement (doi:10.7554/elife.34702), 2018-05-01
Supplement: supp [file elife-34702-supp-v1.zip]

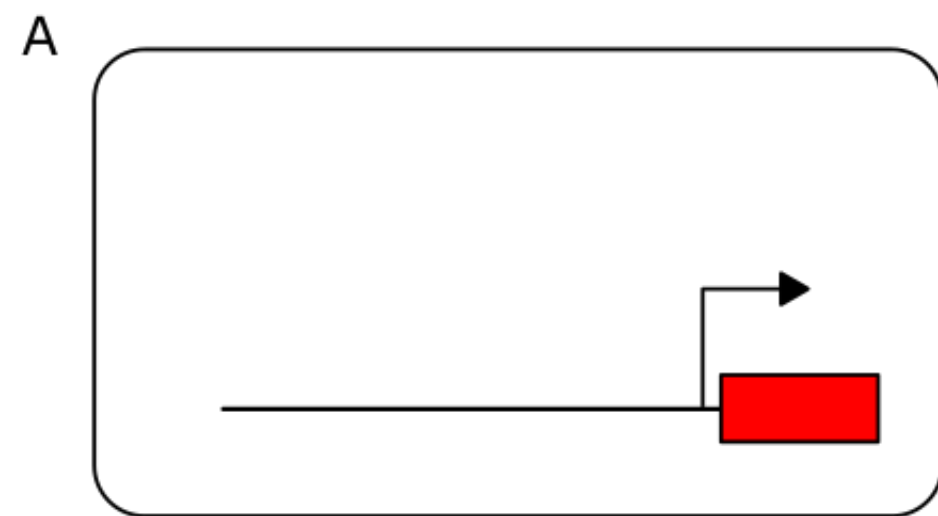

**Unregulated reporter**

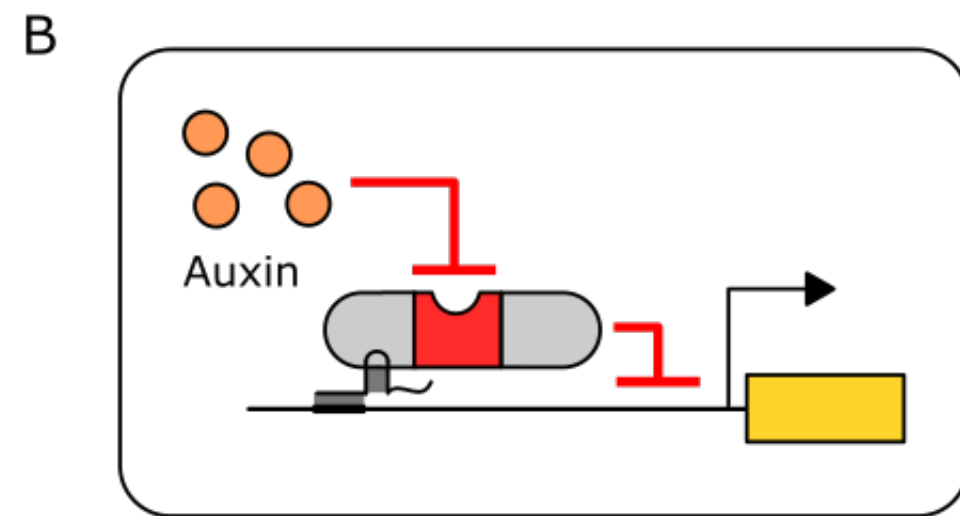

**Auxin regulated reporter**

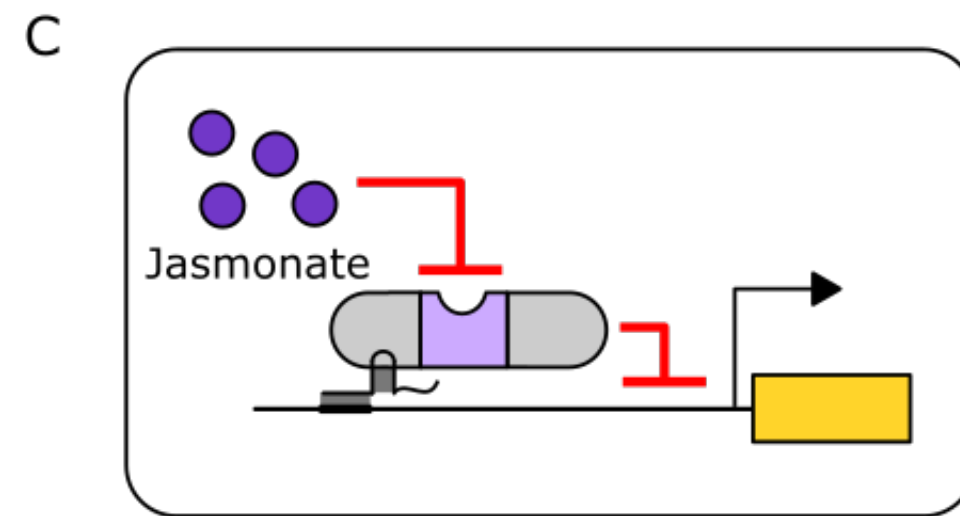

**Jasmonate regulated reporter**

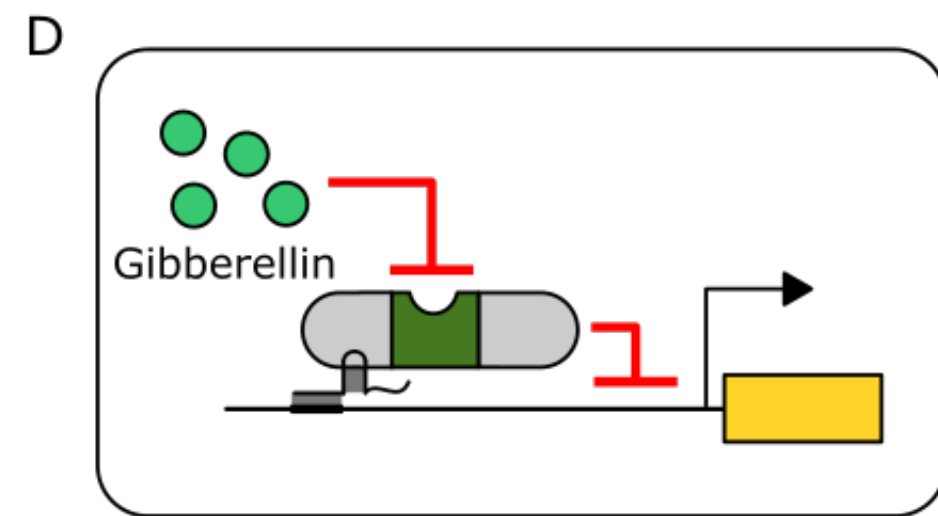

**Gibberellin regulated reporter**

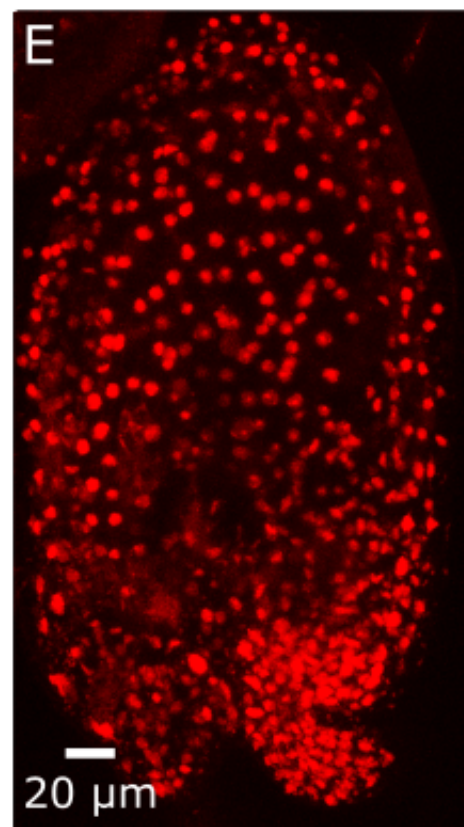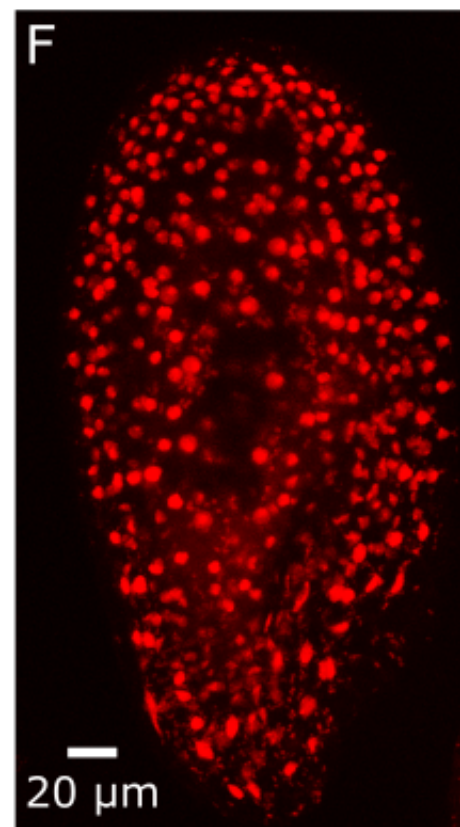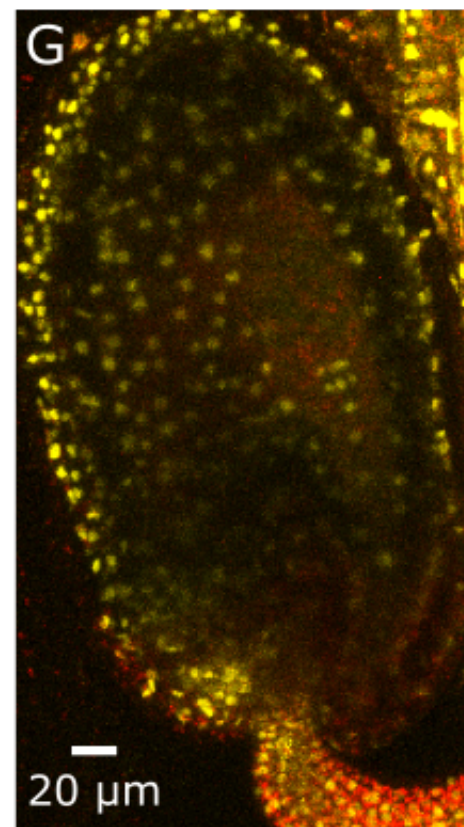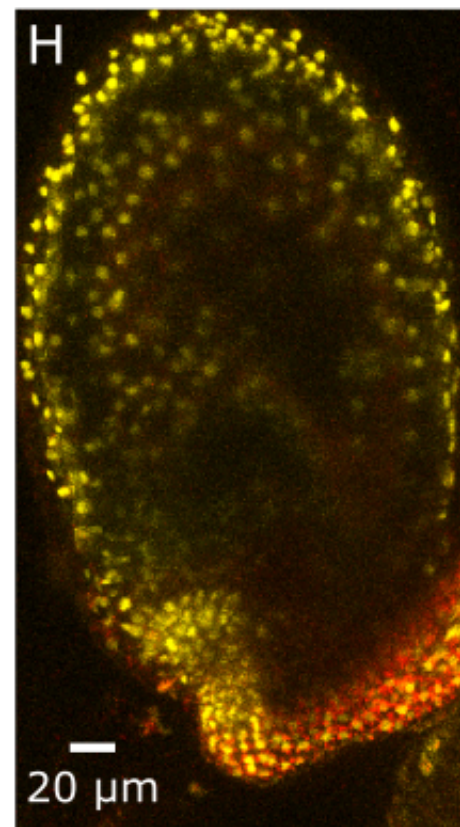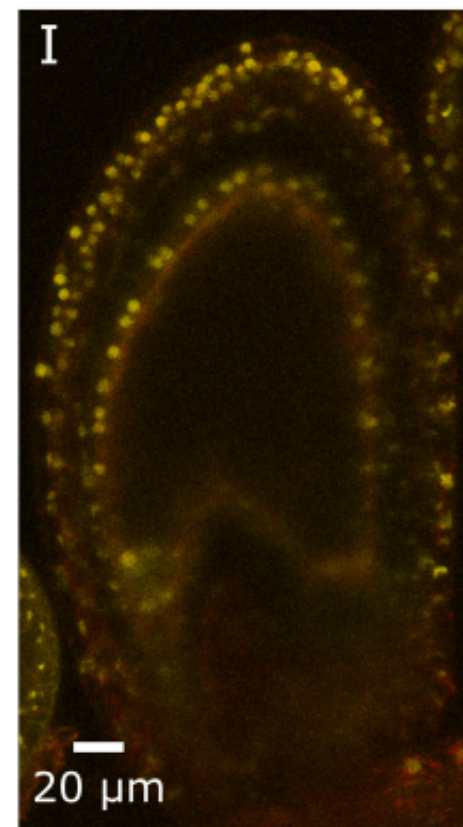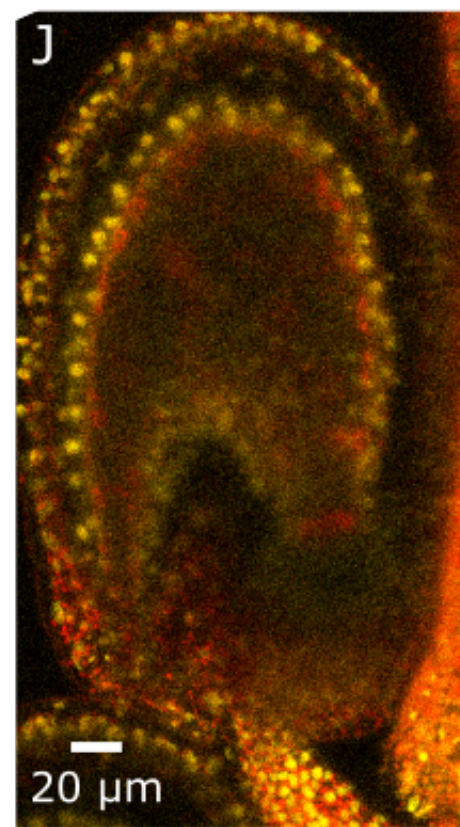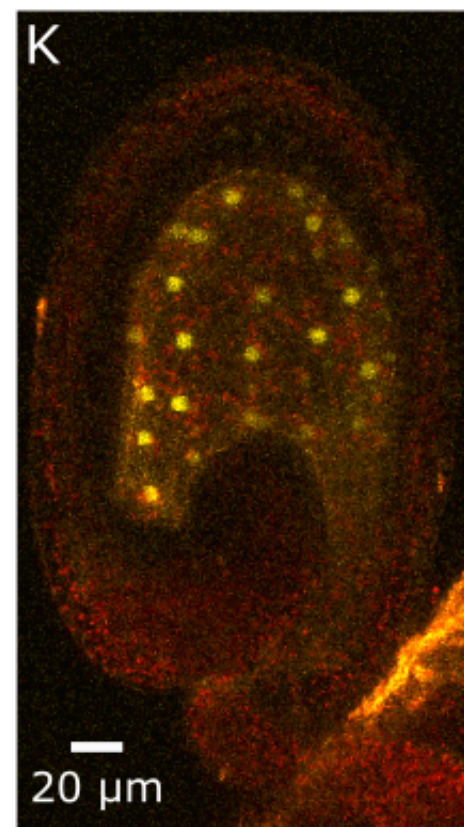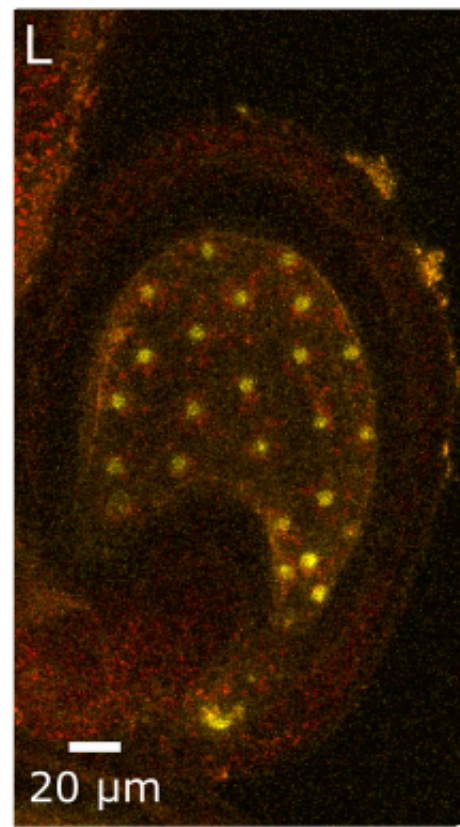

20  $\mu$ m

20  $\mu$ m
