# Supplementary figures and images for: Synthetic hormone-responsive transcription factors can monitor and re-program plant development
Source: eLife journal article supplement (doi:10.7554/elife.34702), 2018-05-01

A

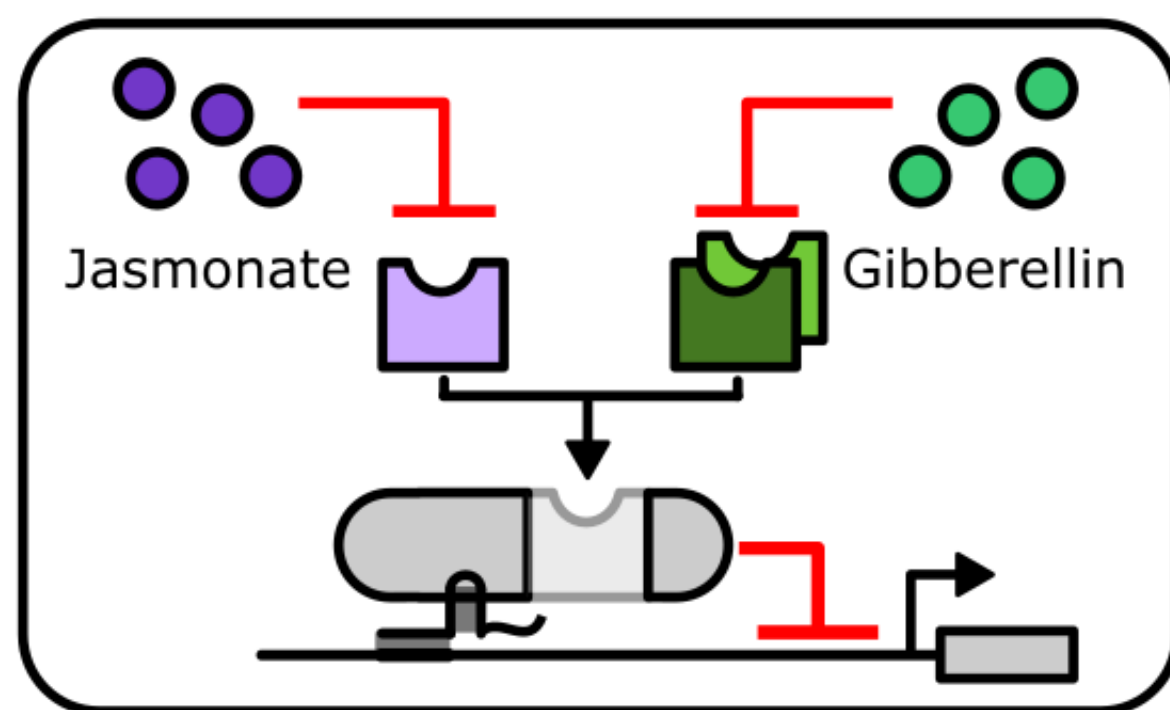

B

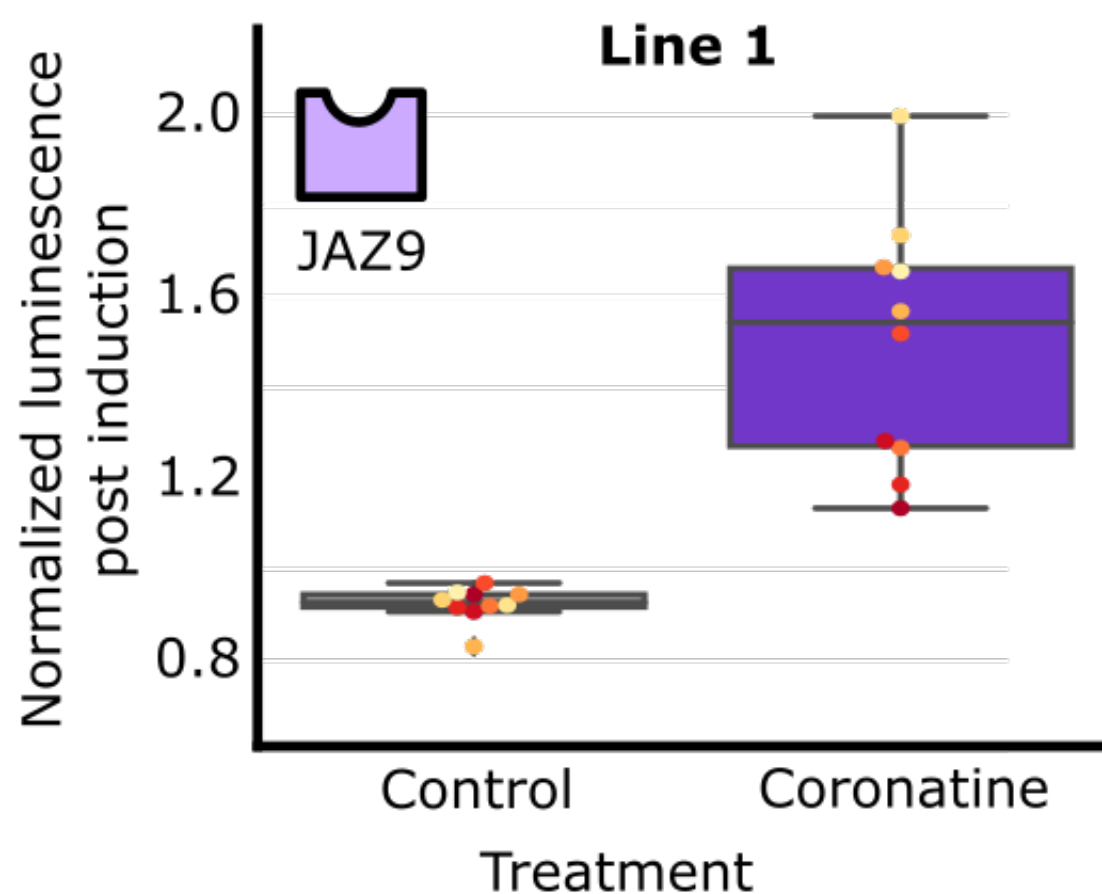

C

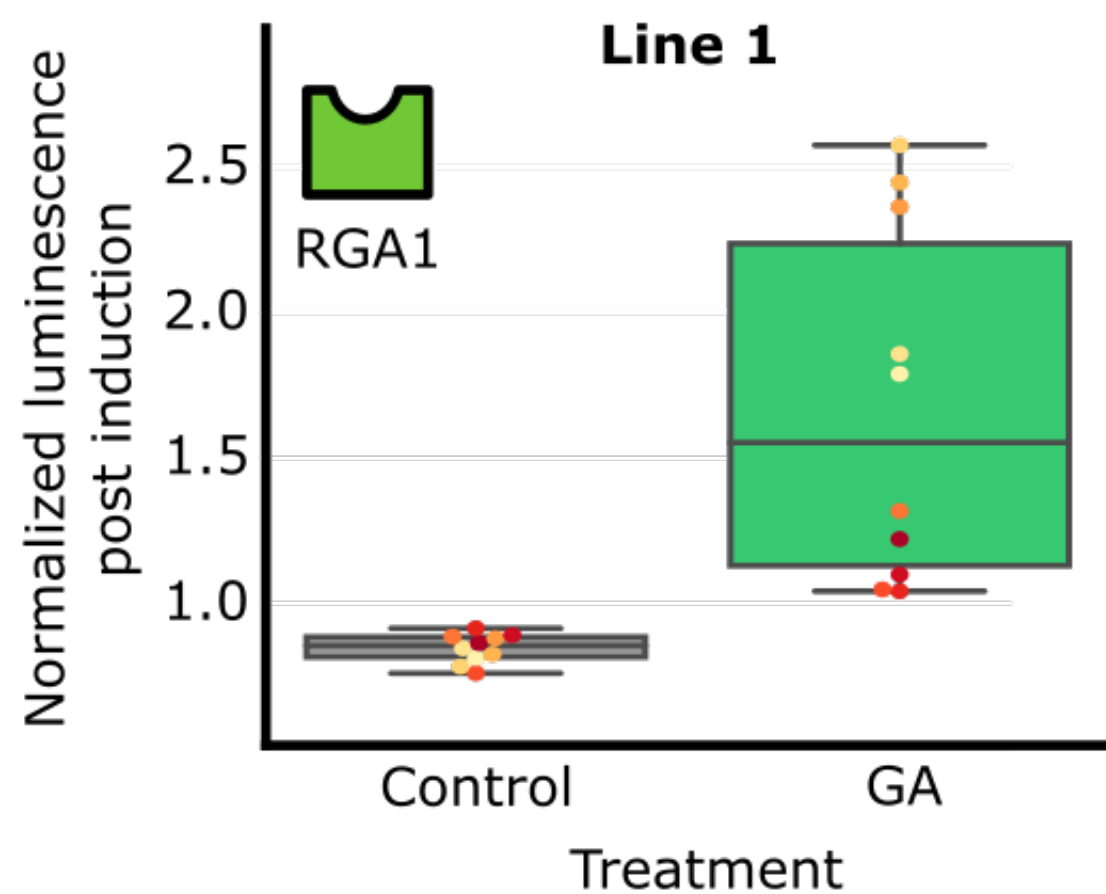

D

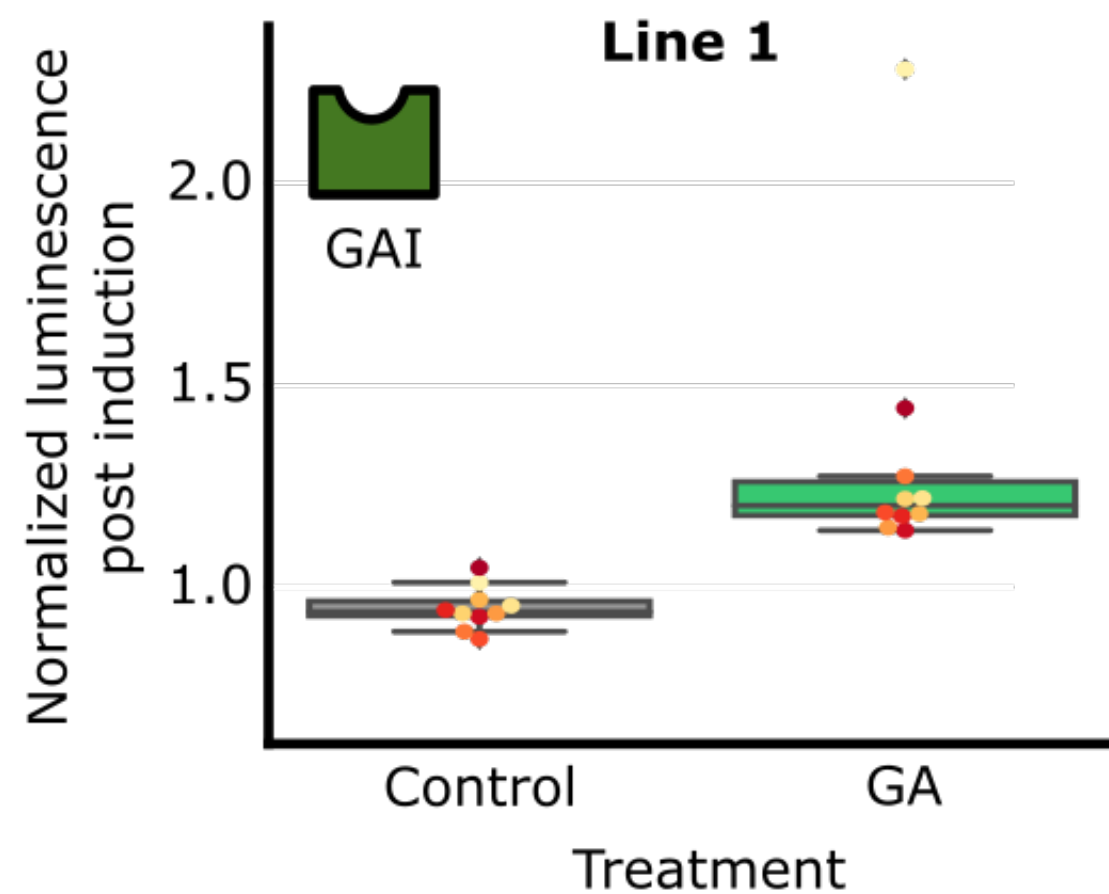

B

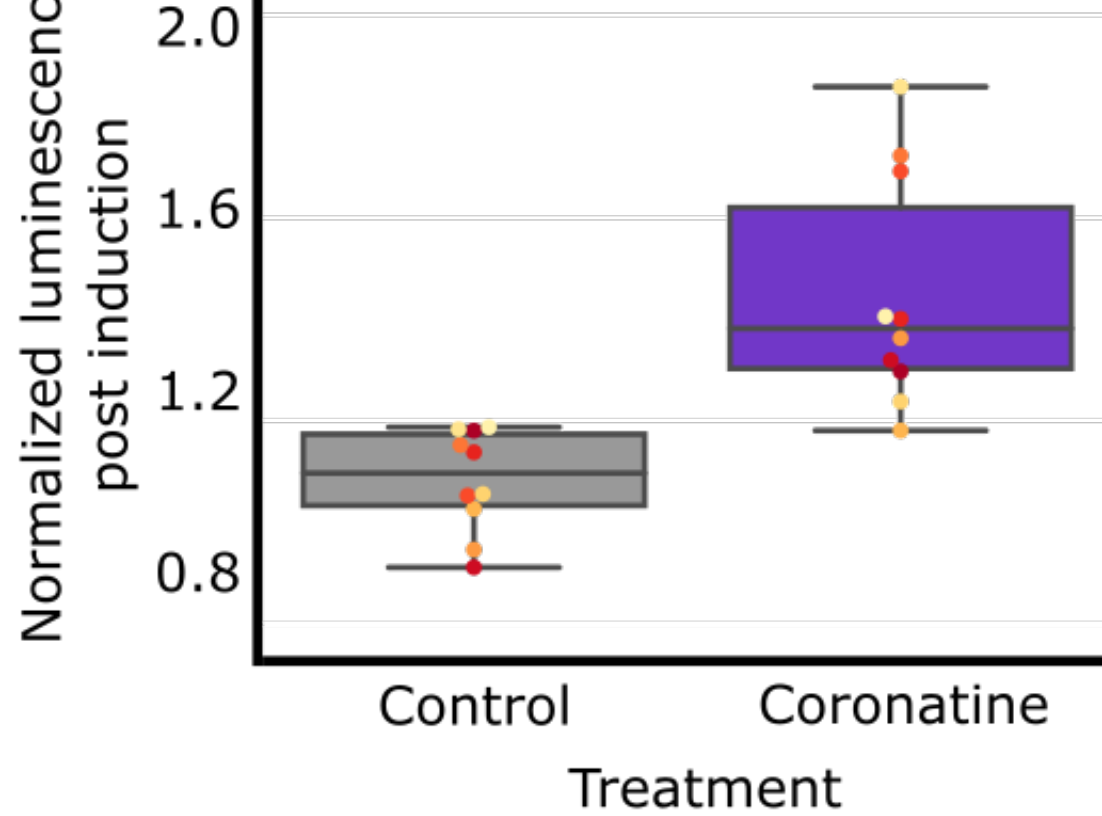

C

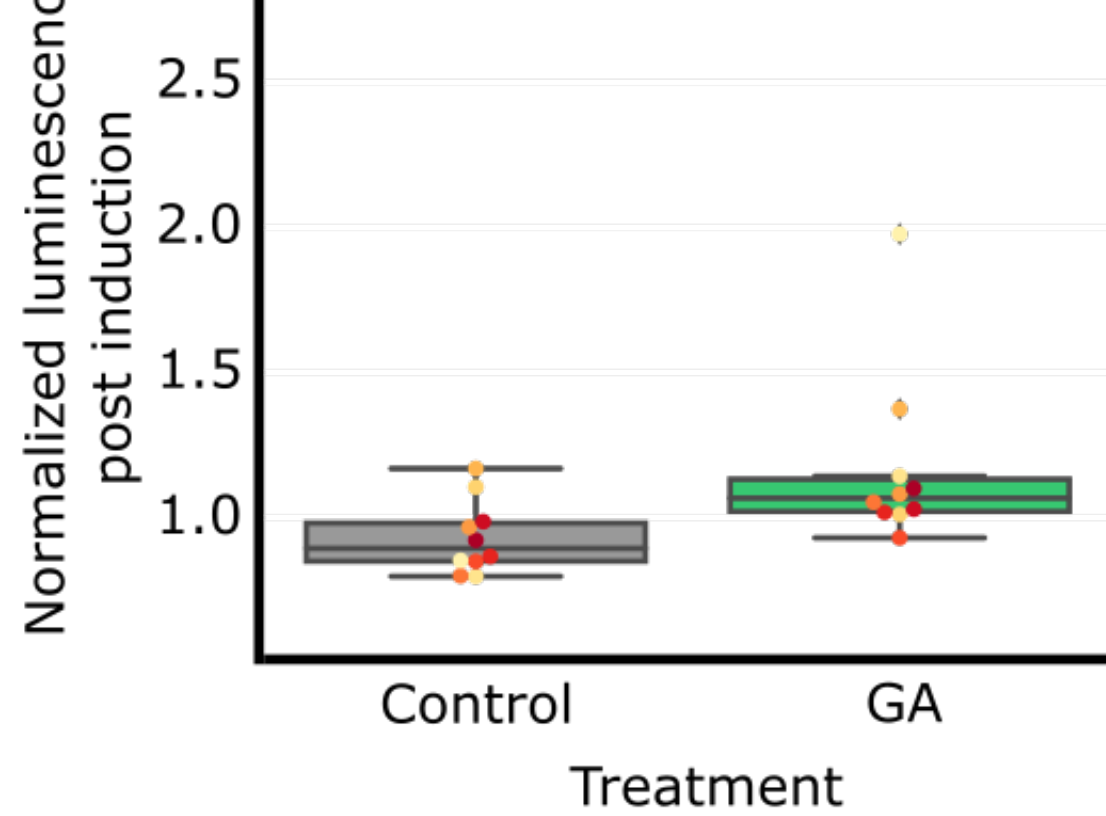

D

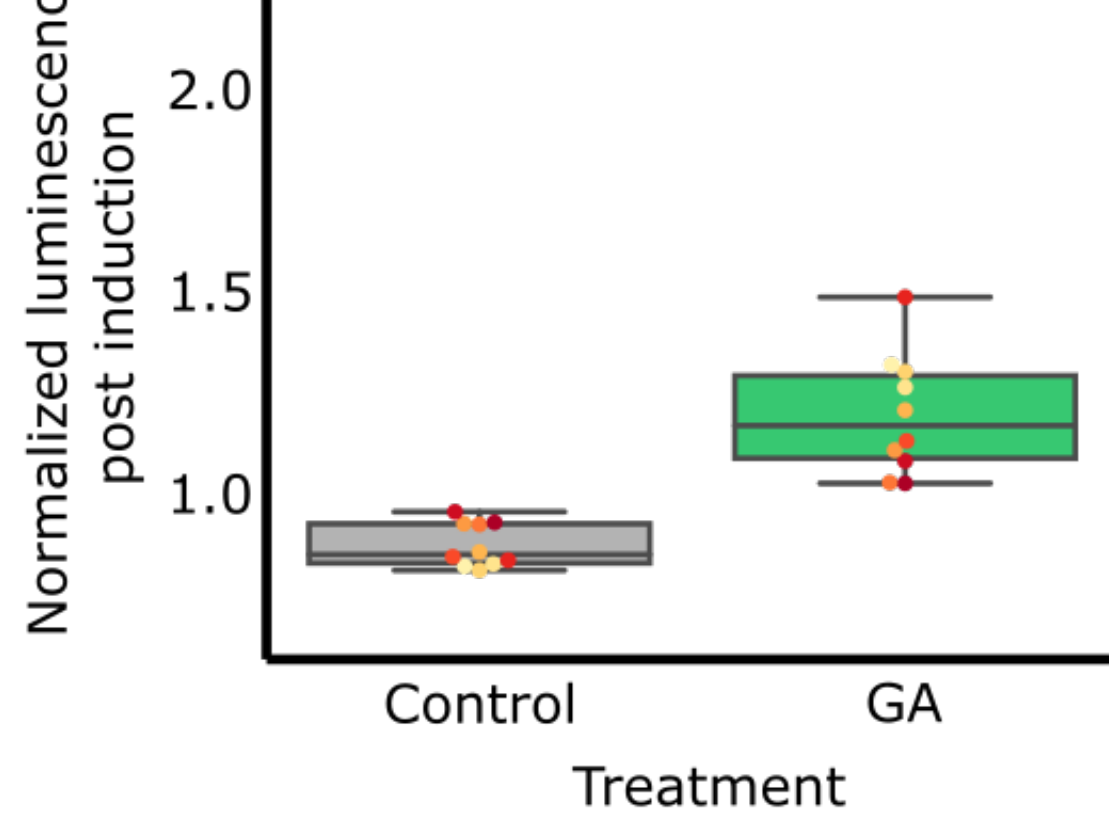

B

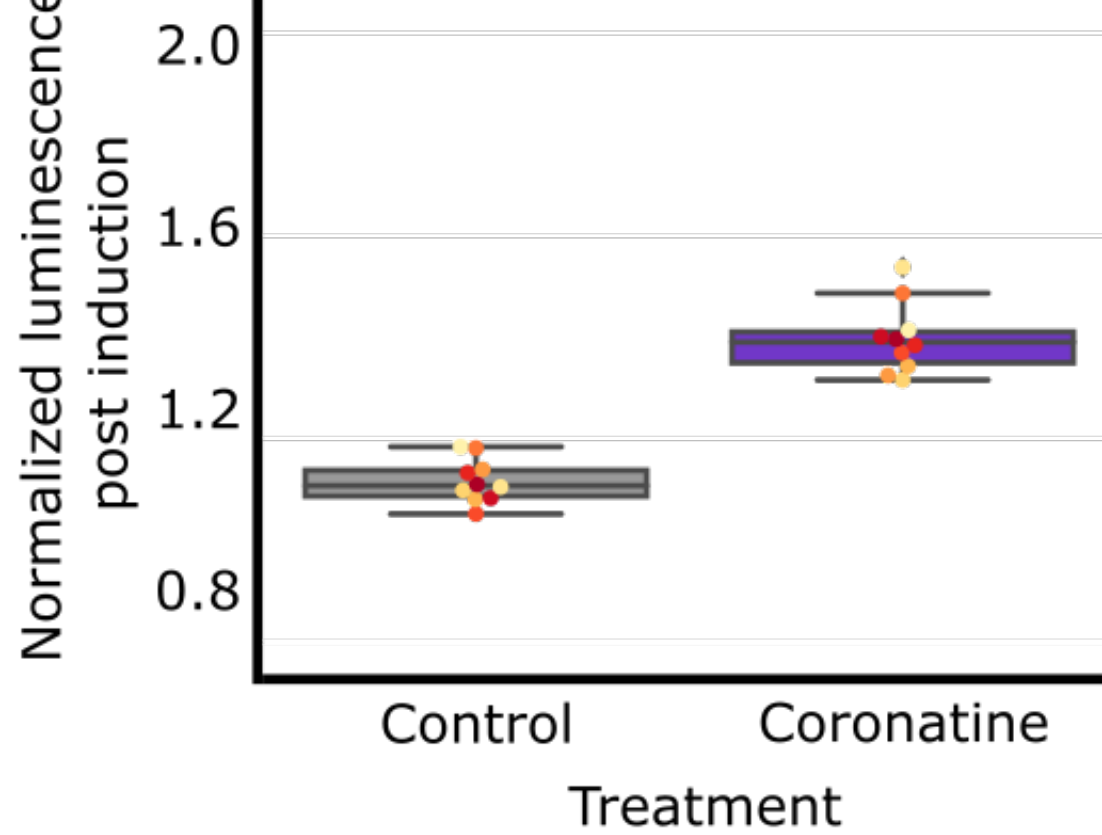

C

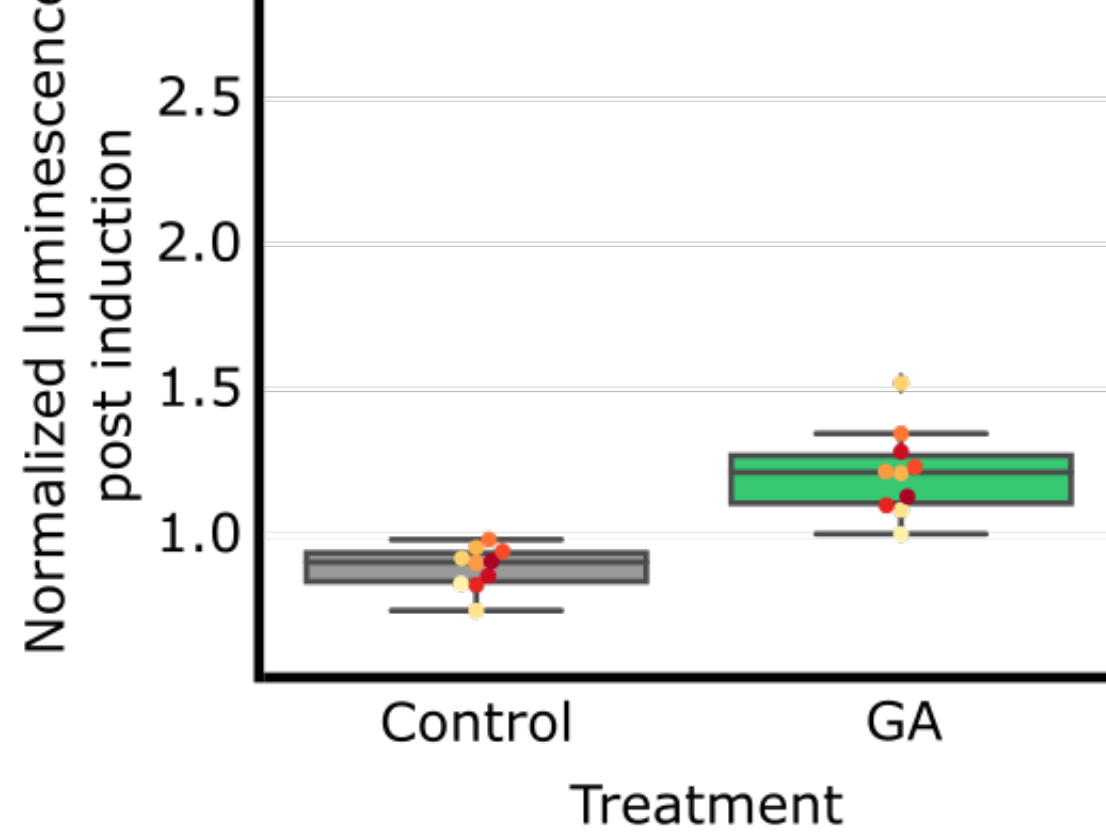

D

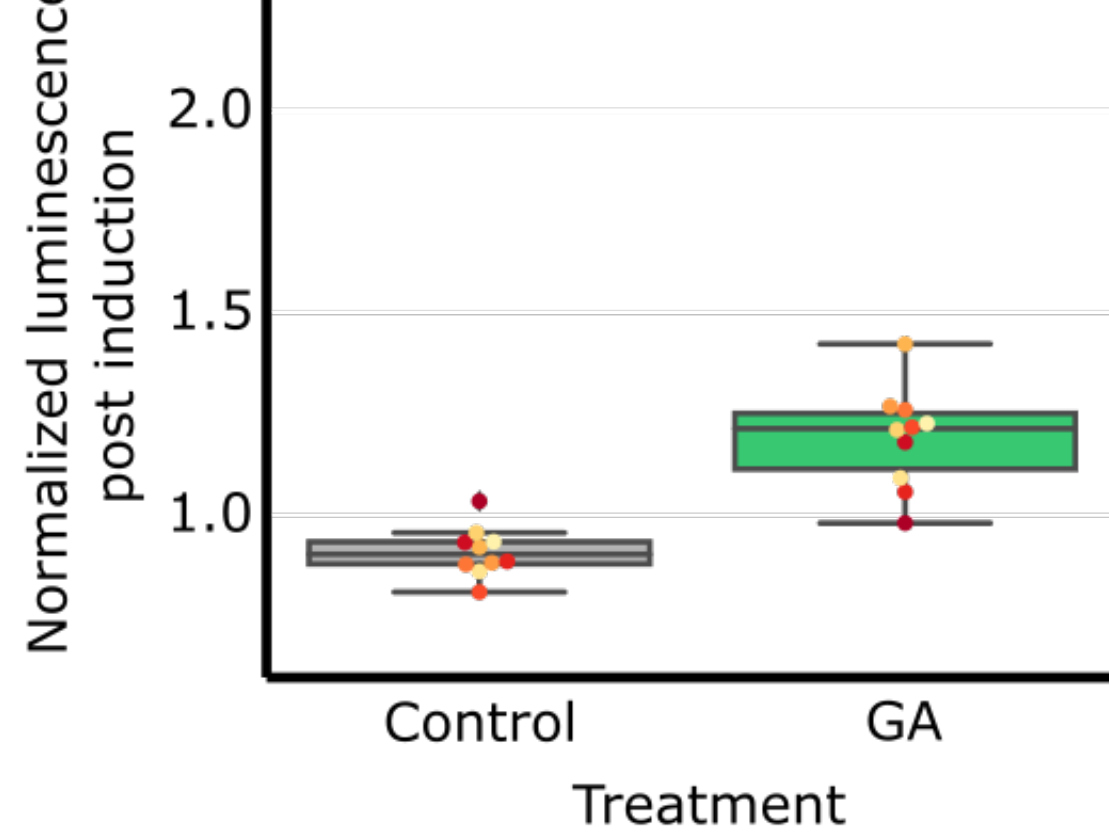

Supplement: supp [file elife-34702-supp-v1.zip]

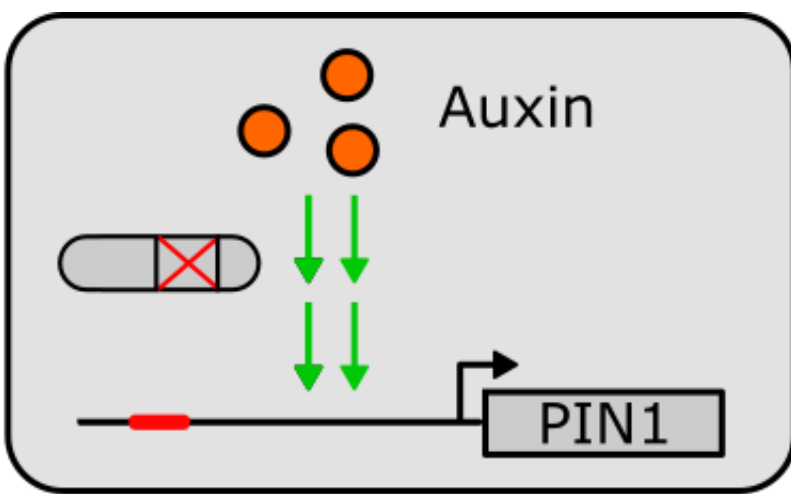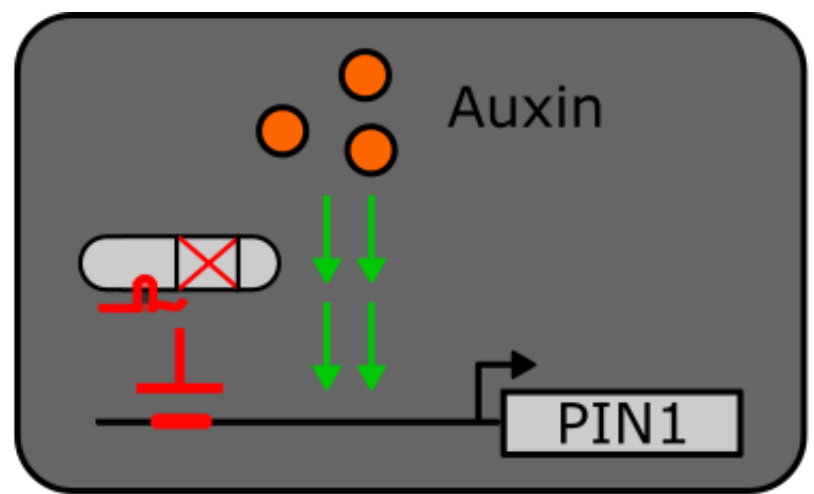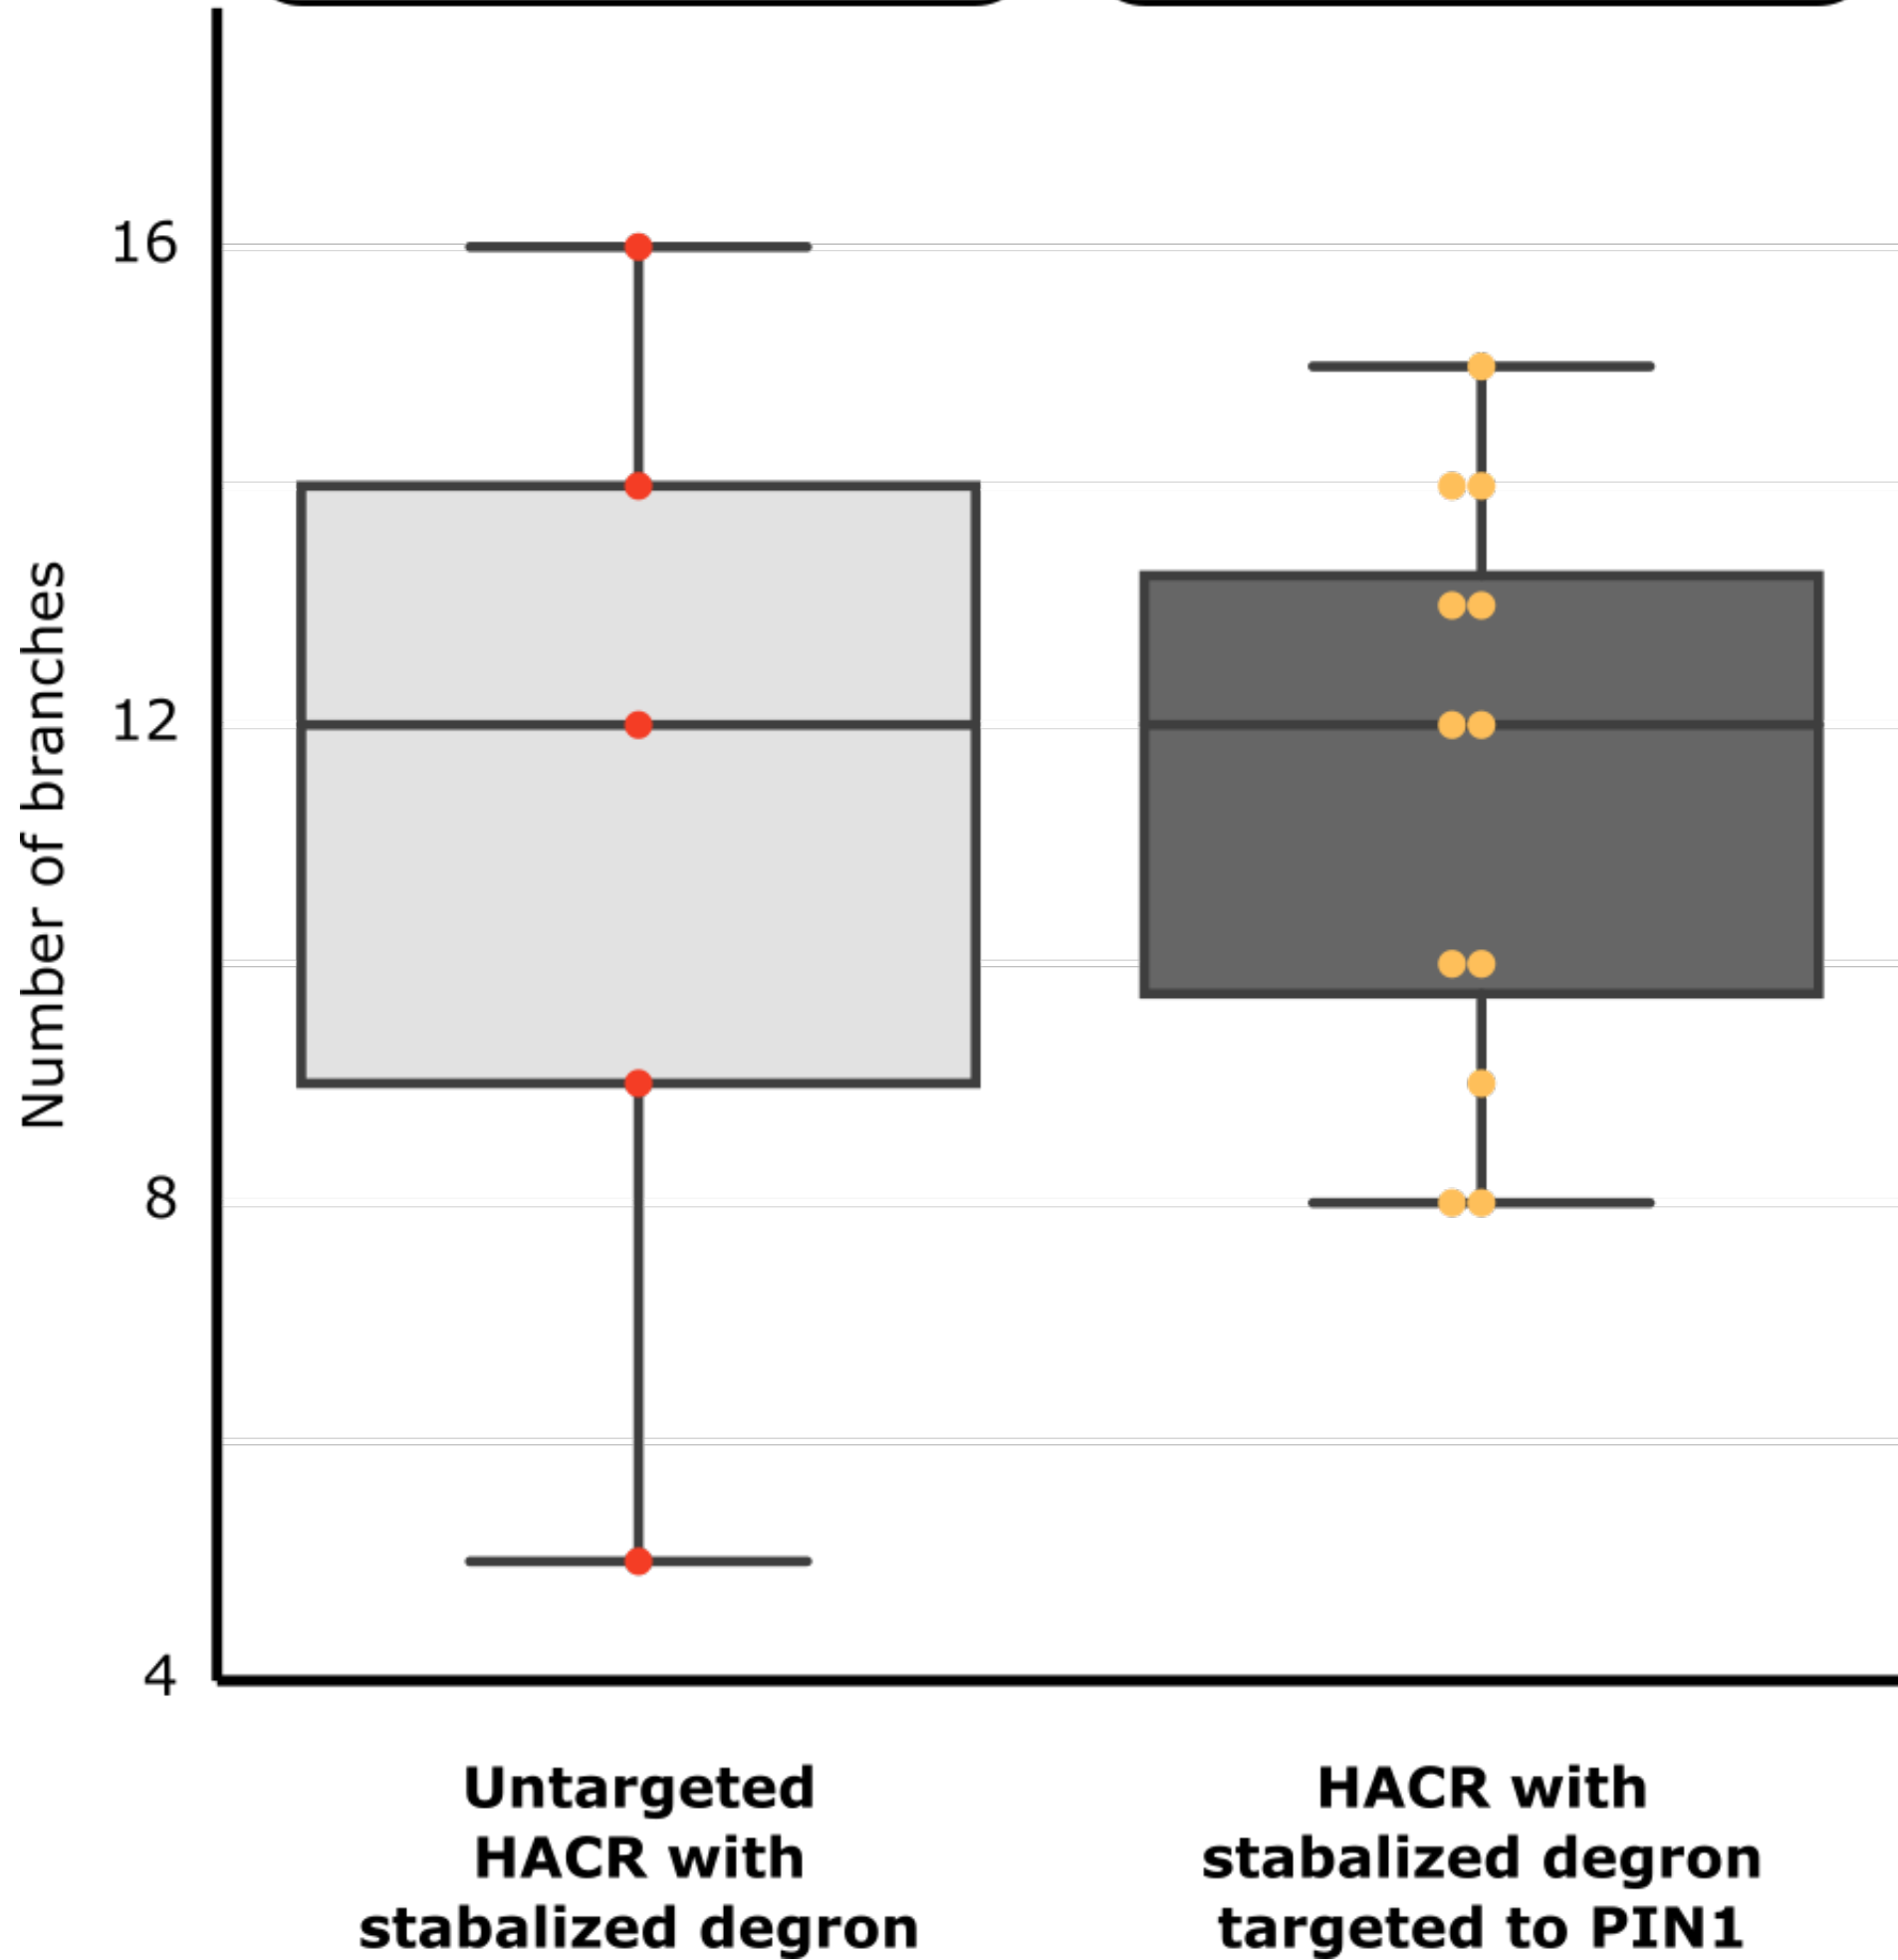

Supplement: supp [file elife-34702-supp-v1.zip]

A

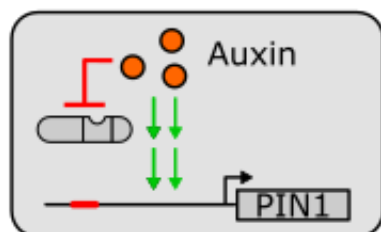

Transcriptional feedback strength

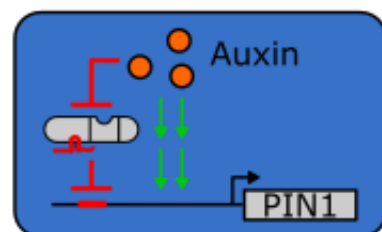

B

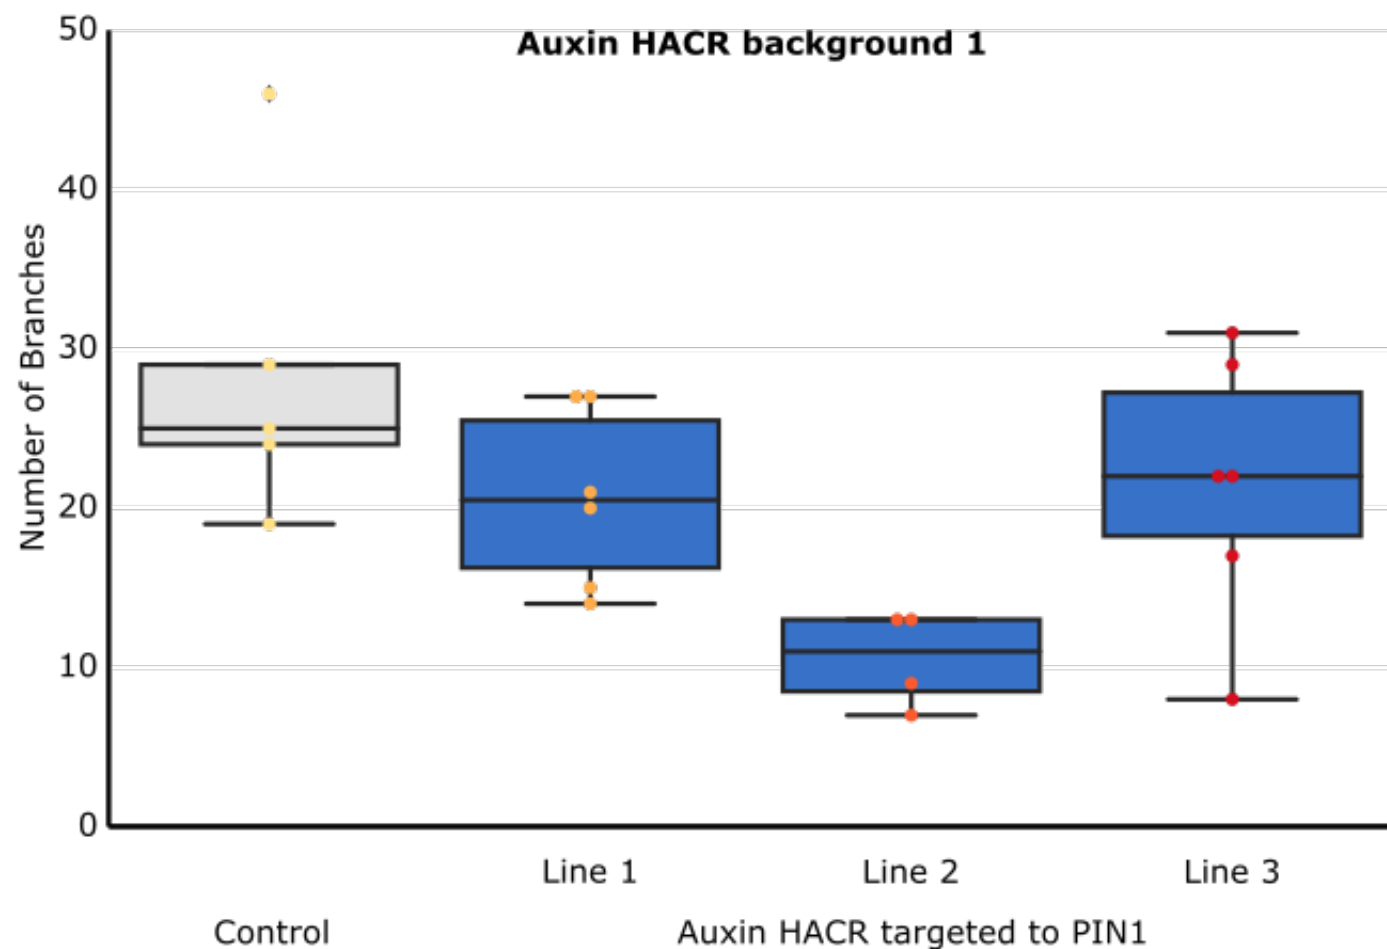

C

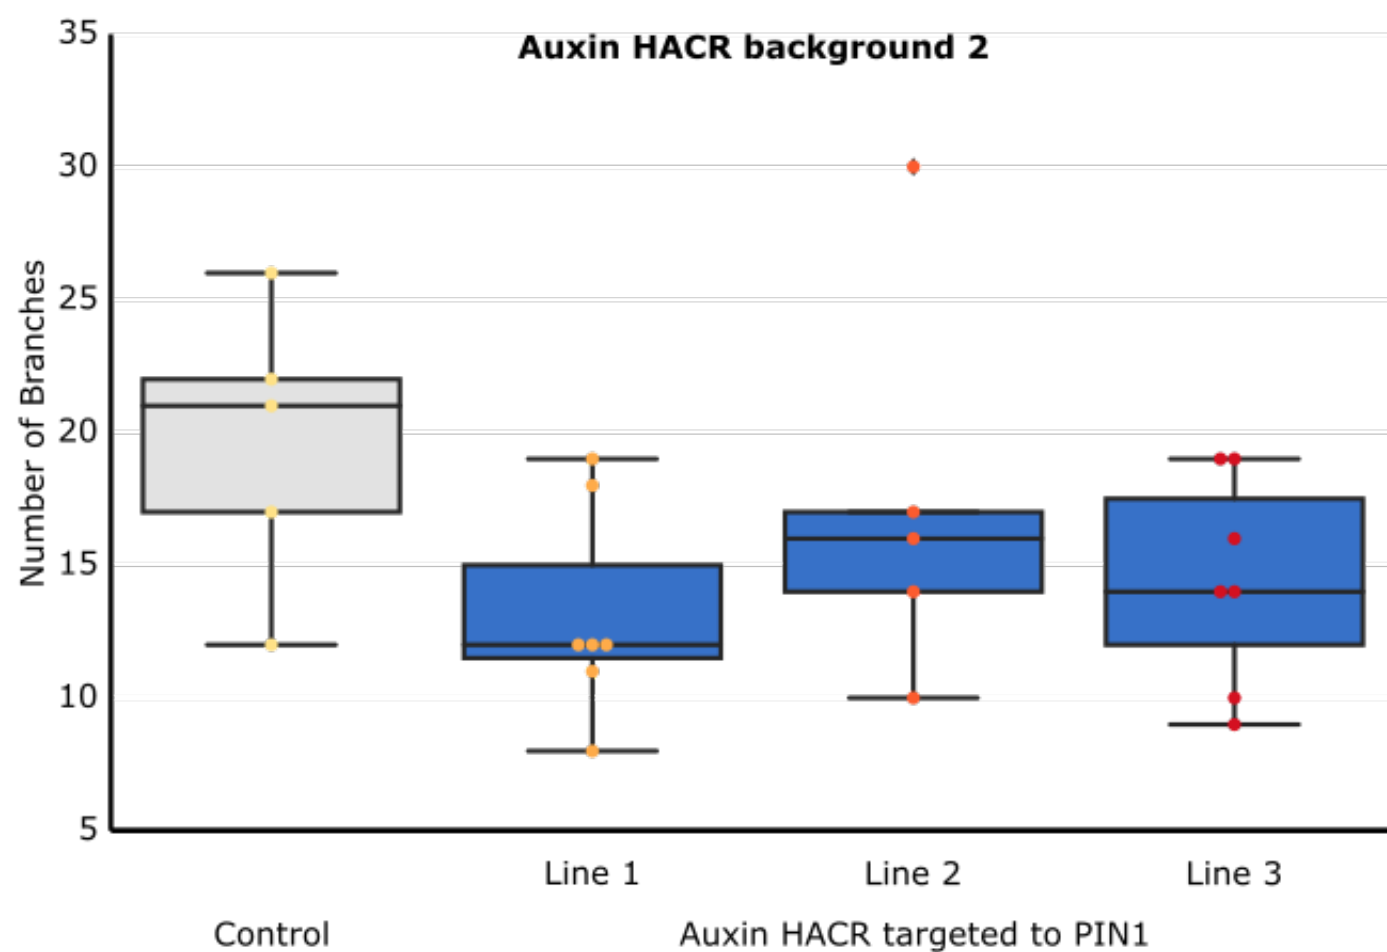

Supplement: supp [file elife-34702-supp-v1.zip]

A

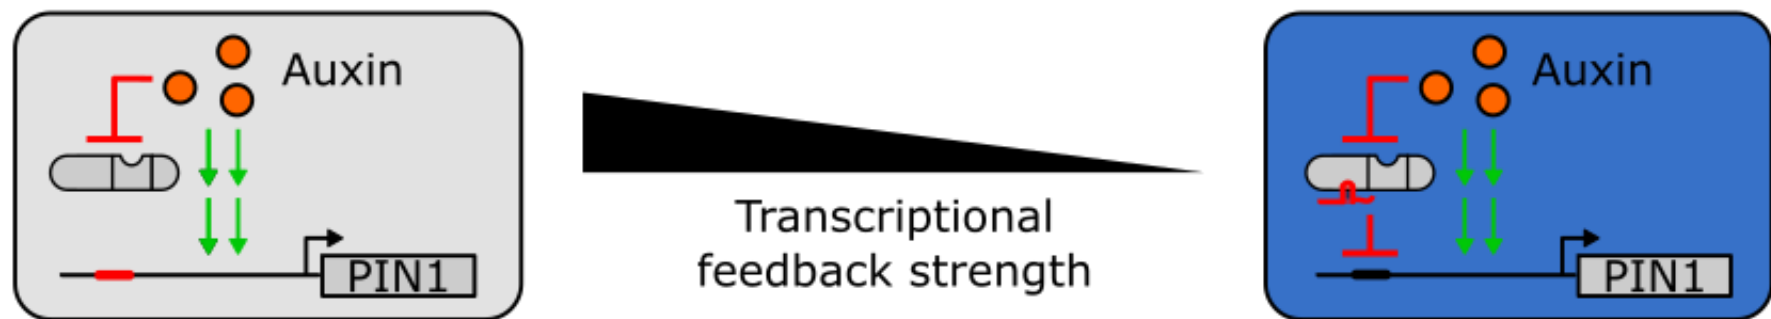

B

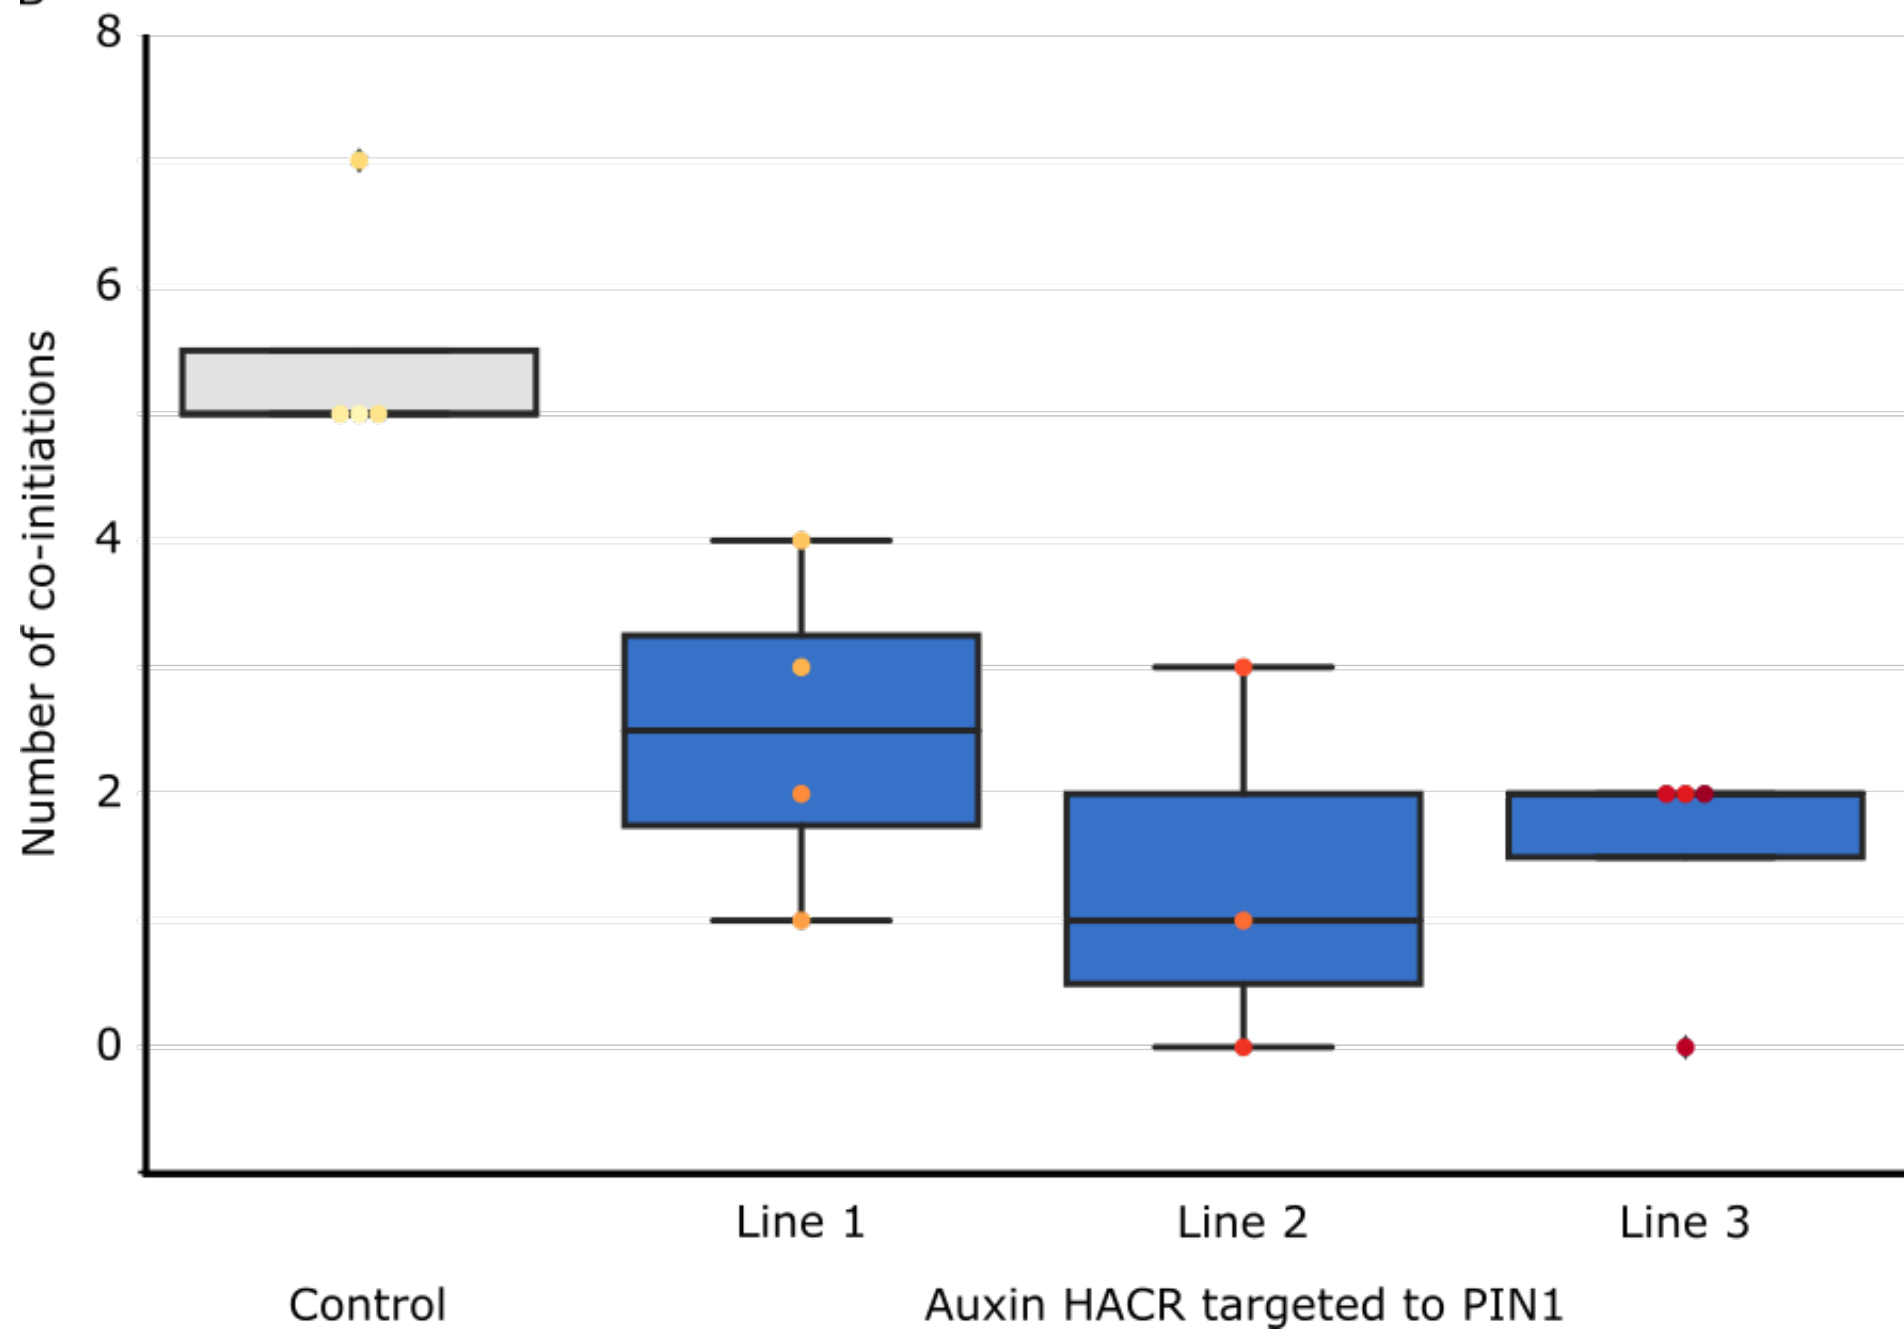

Supplement: supp [file elife-34702-supp-v1.zip]

A

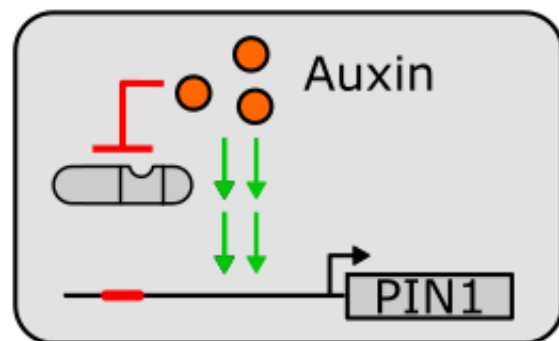

Transcriptional feedback strength

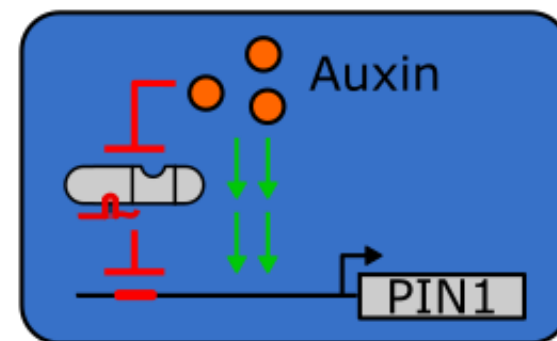

B

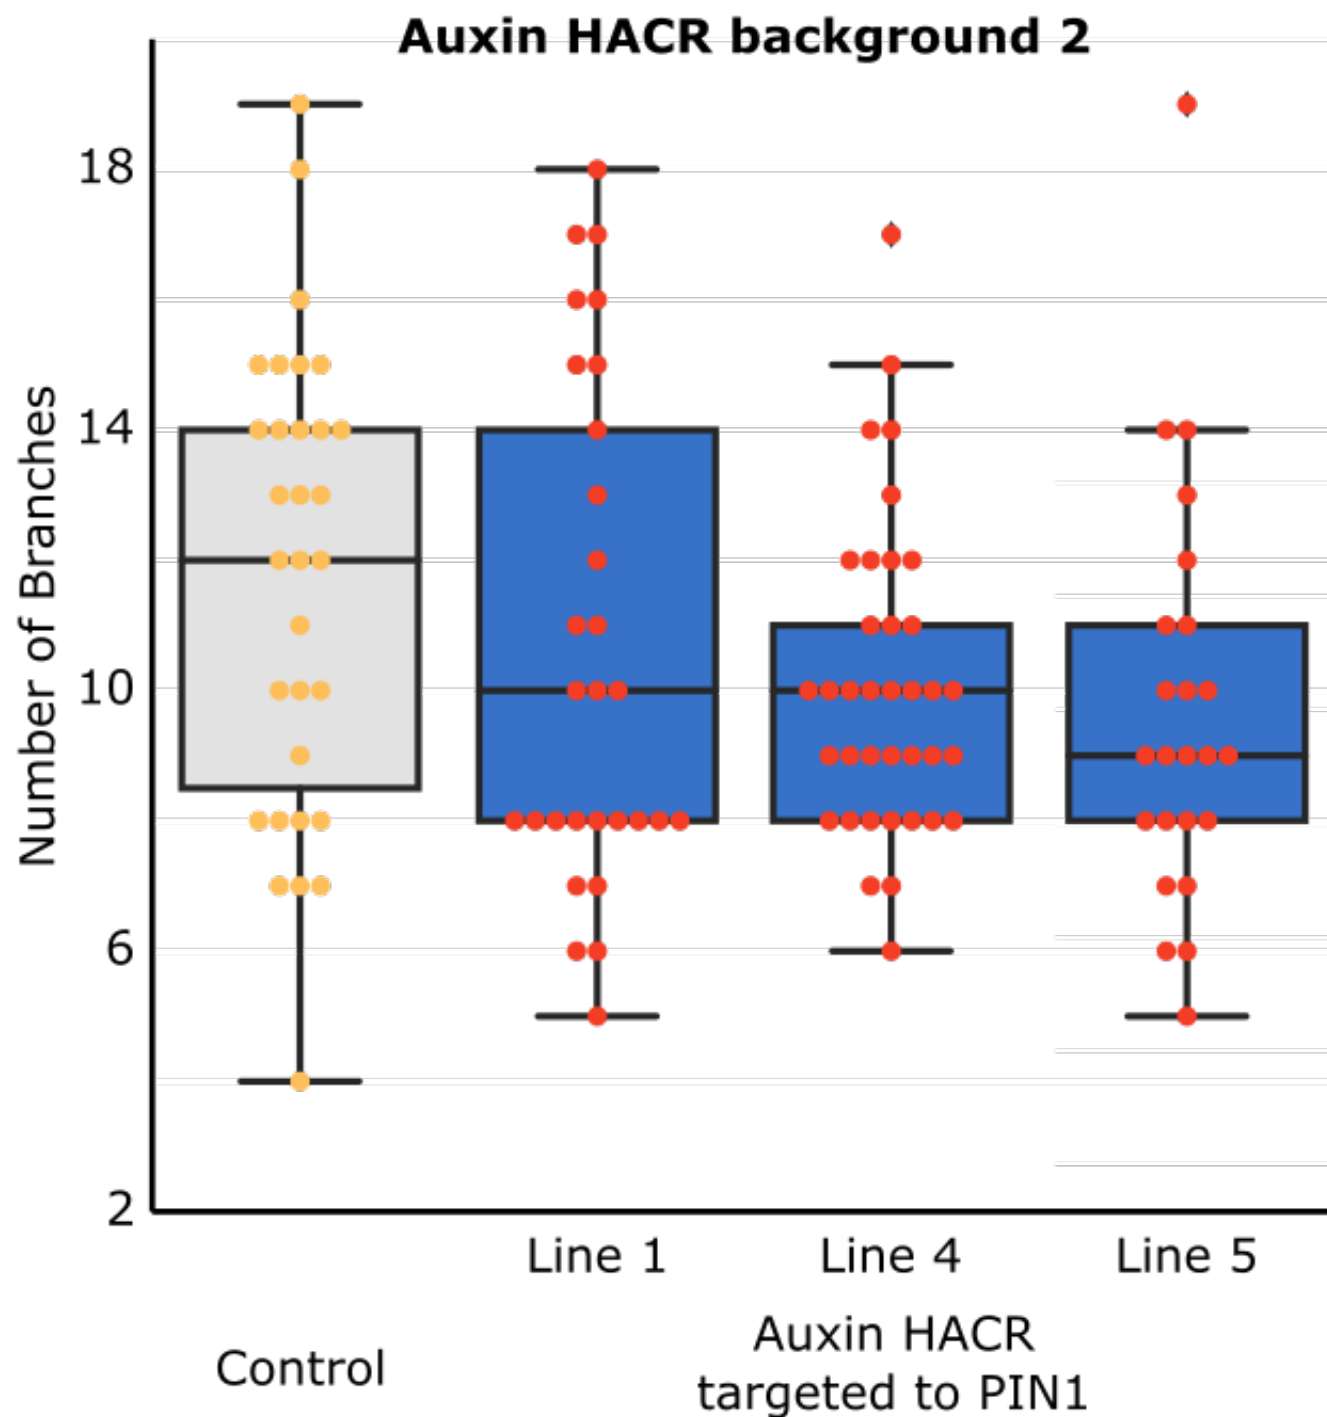

C

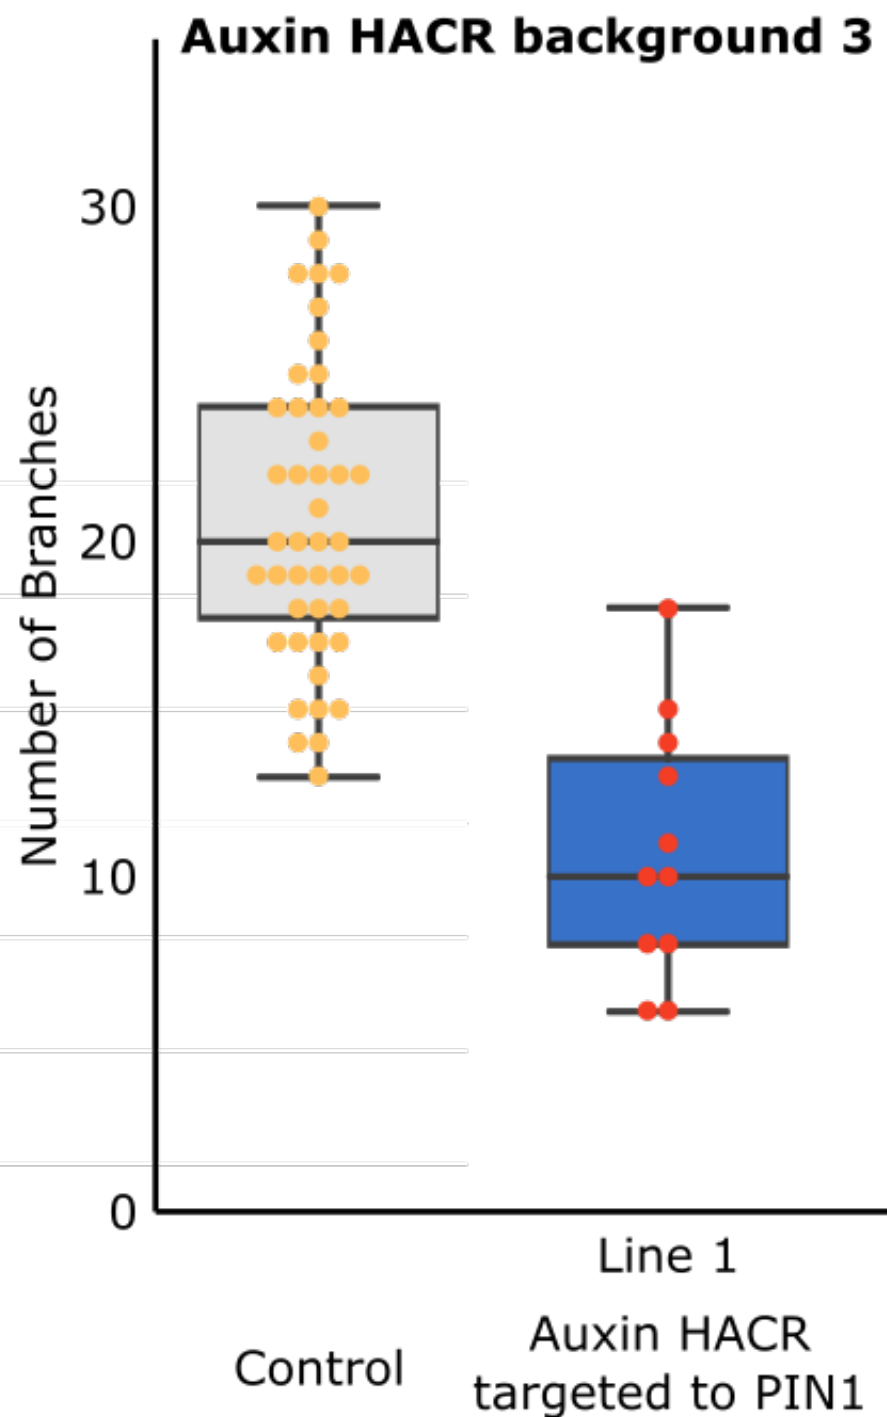

Supplement: supp [file elife-34702-supp-v1.zip]

A

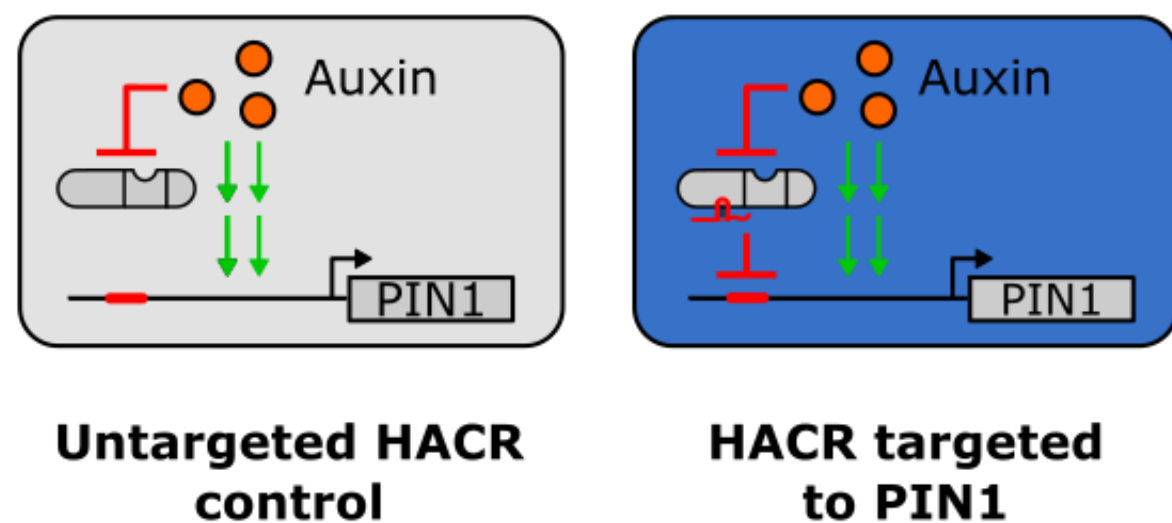

B

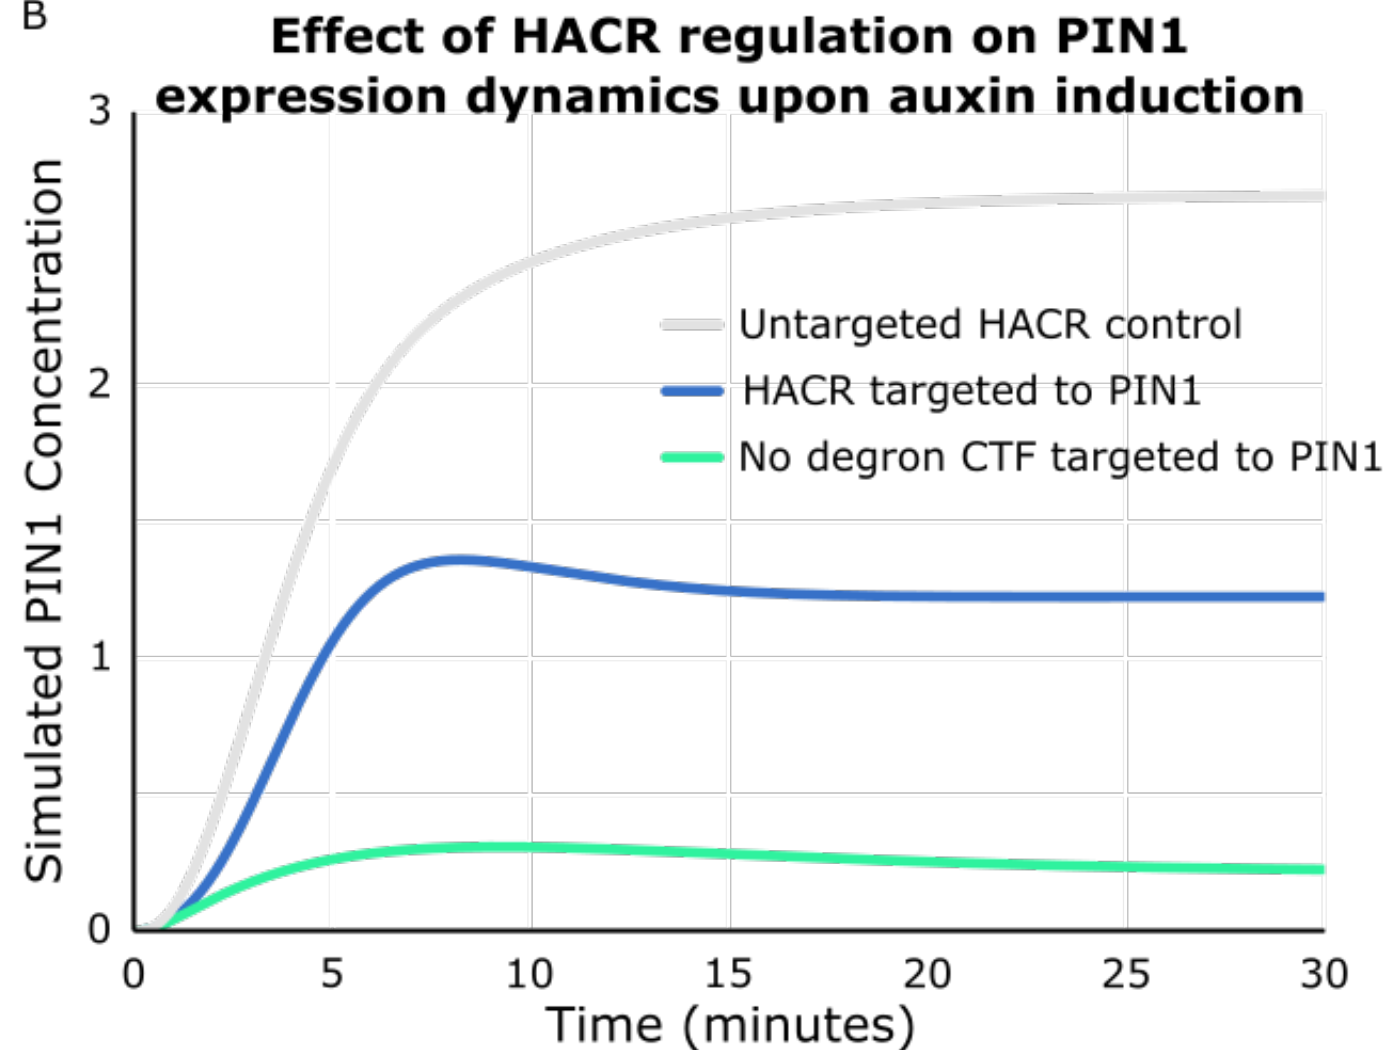

C

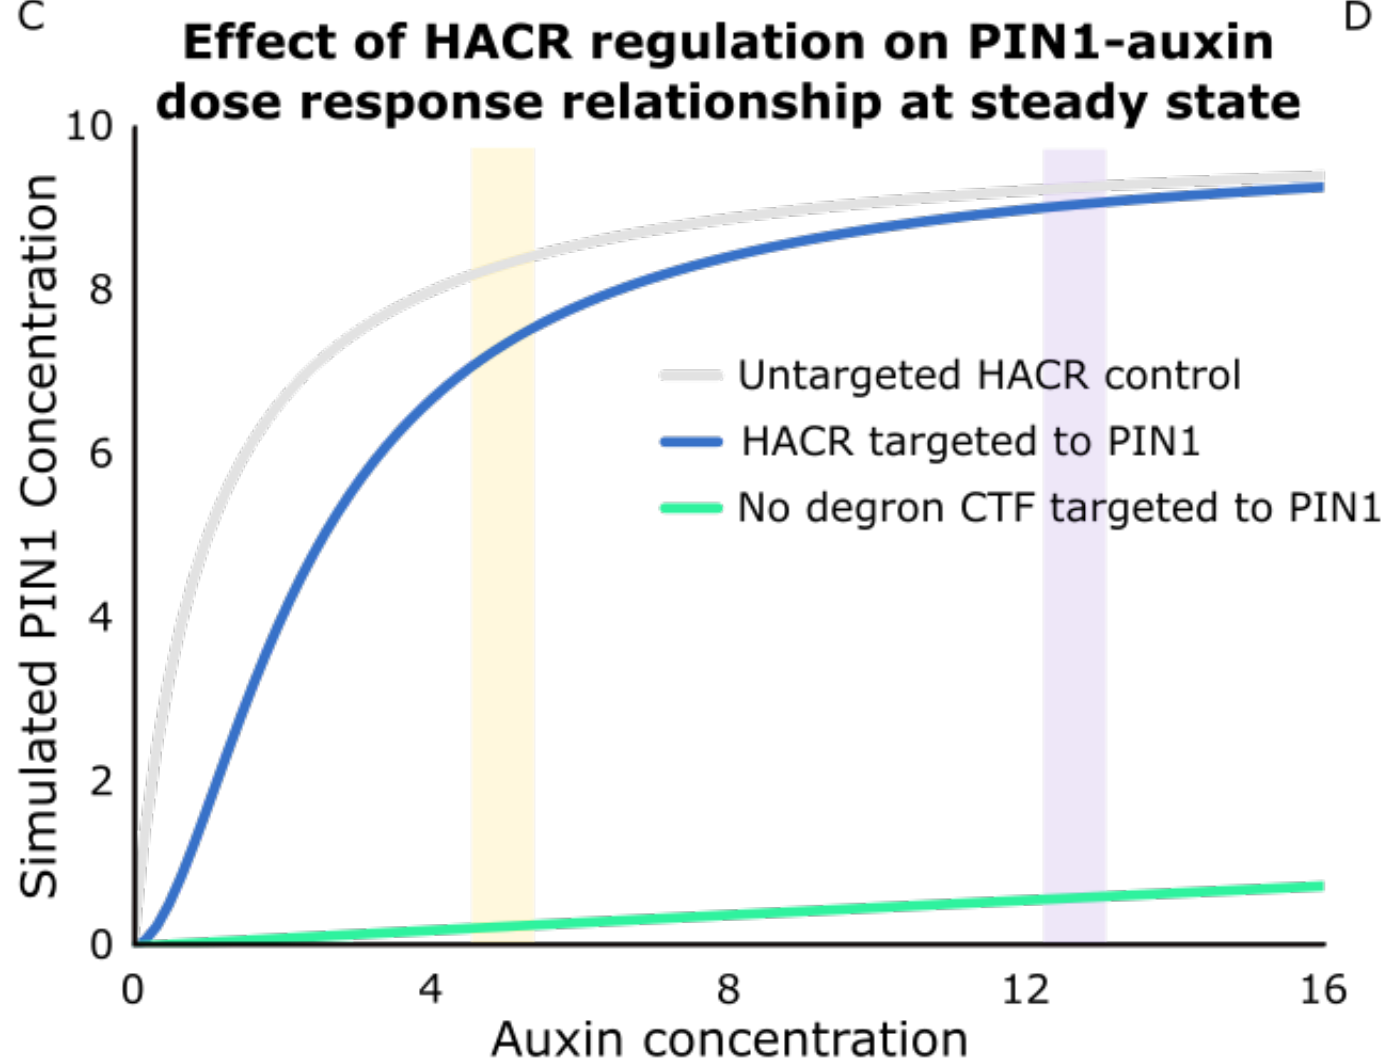

D

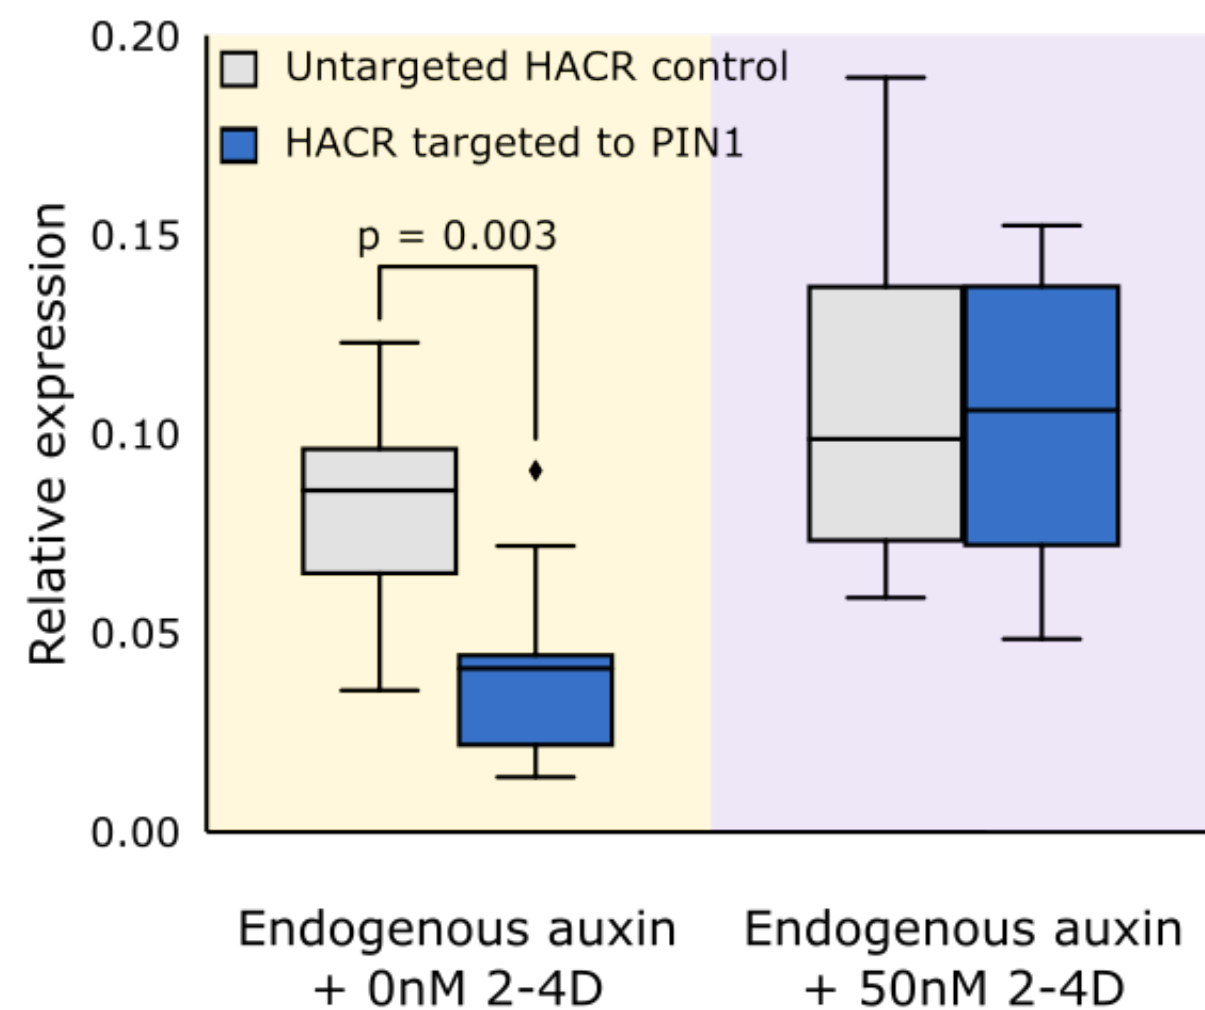

Supplement: supp [file elife-34702-supp-v1.zip]
